# Supplementary material for: Characterization of tumor microenvironment and programmed death-related genes to identify molecular subtypes and drug resistance in pancreatic cancer
Source: Frontiers journal article supplement (doi:10.3389/fphar.2023.1146280), 2023-03-17

A

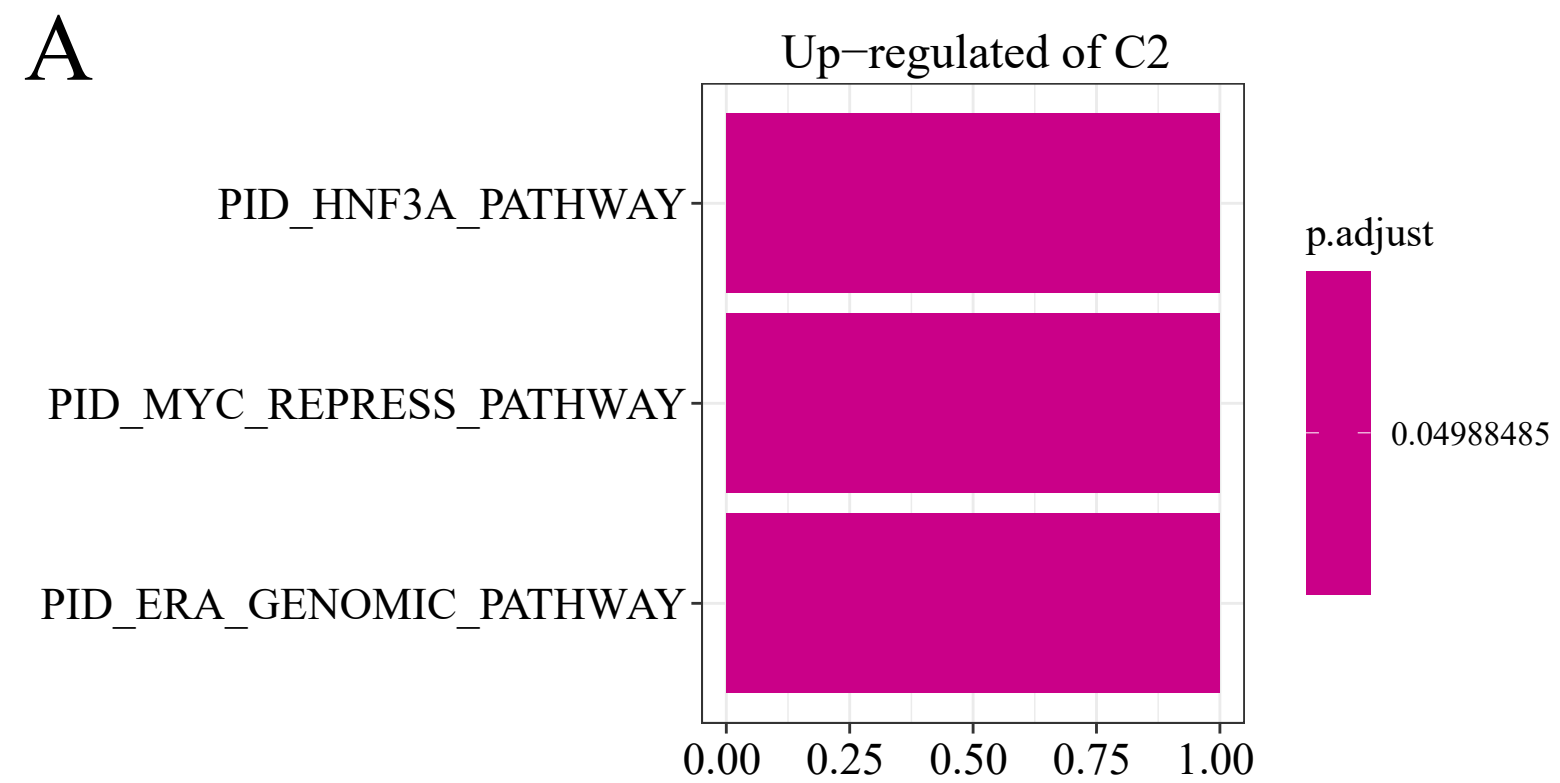

B

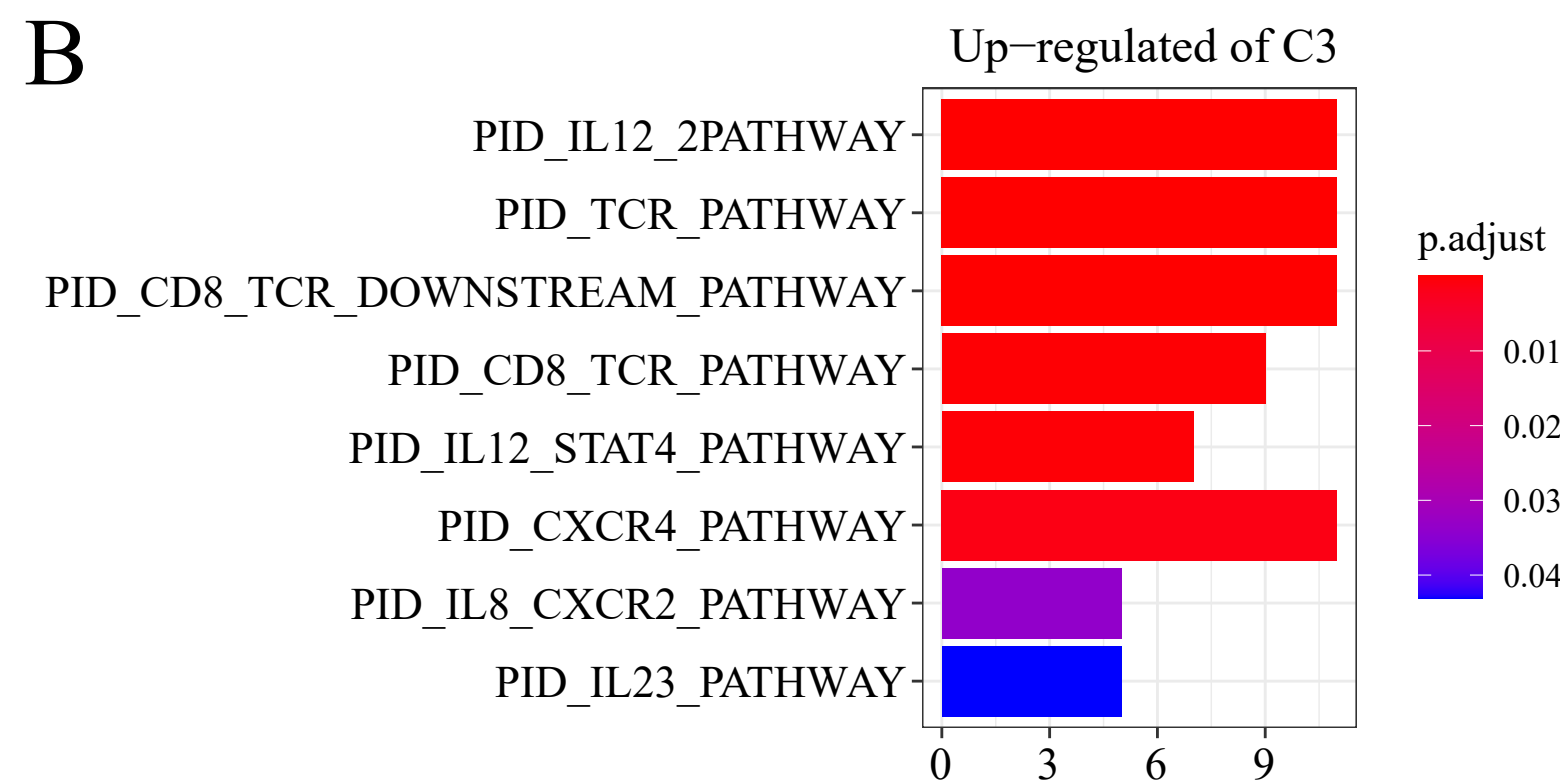

C

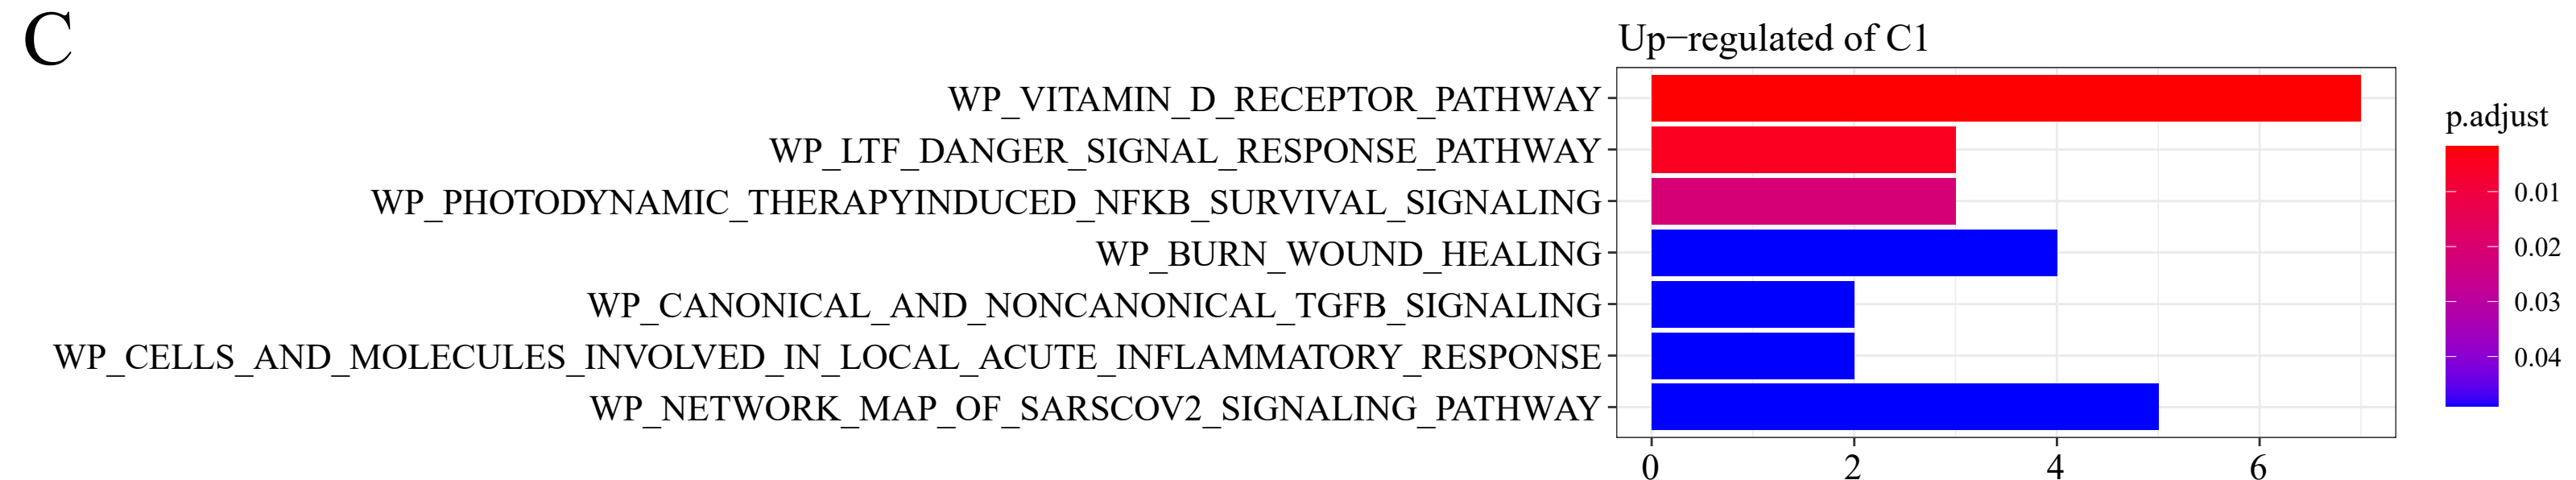

D

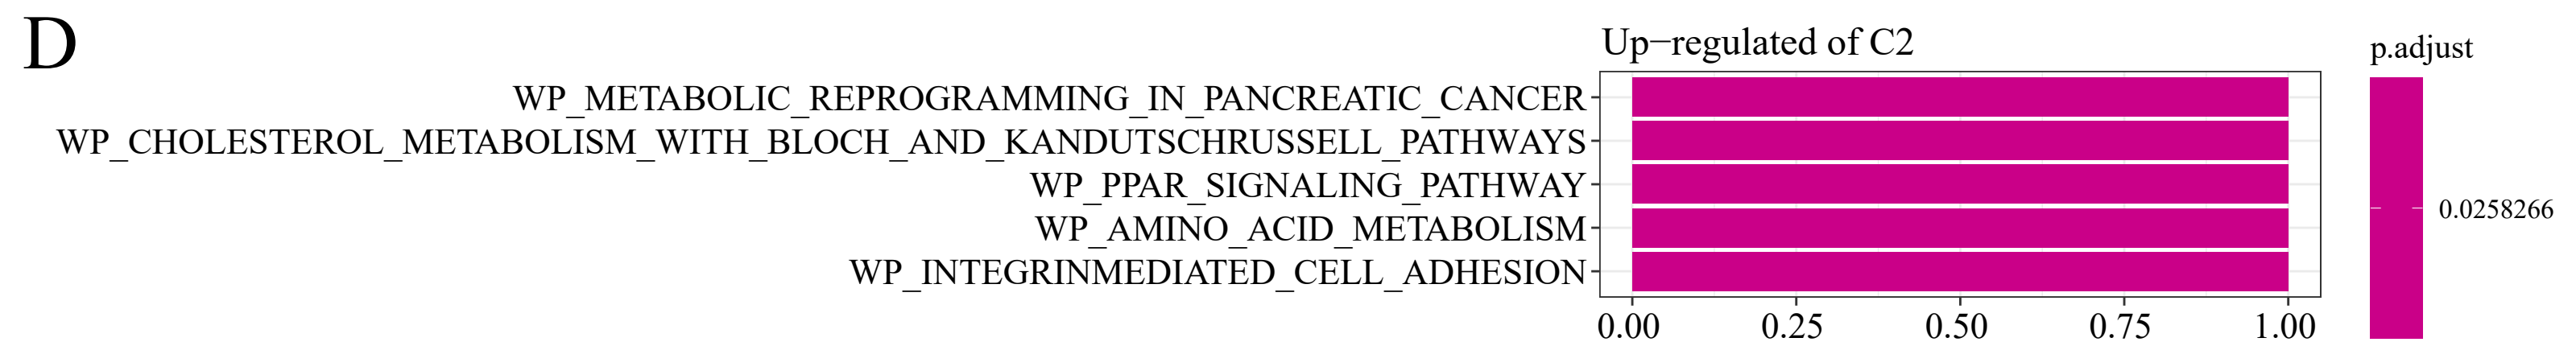

E

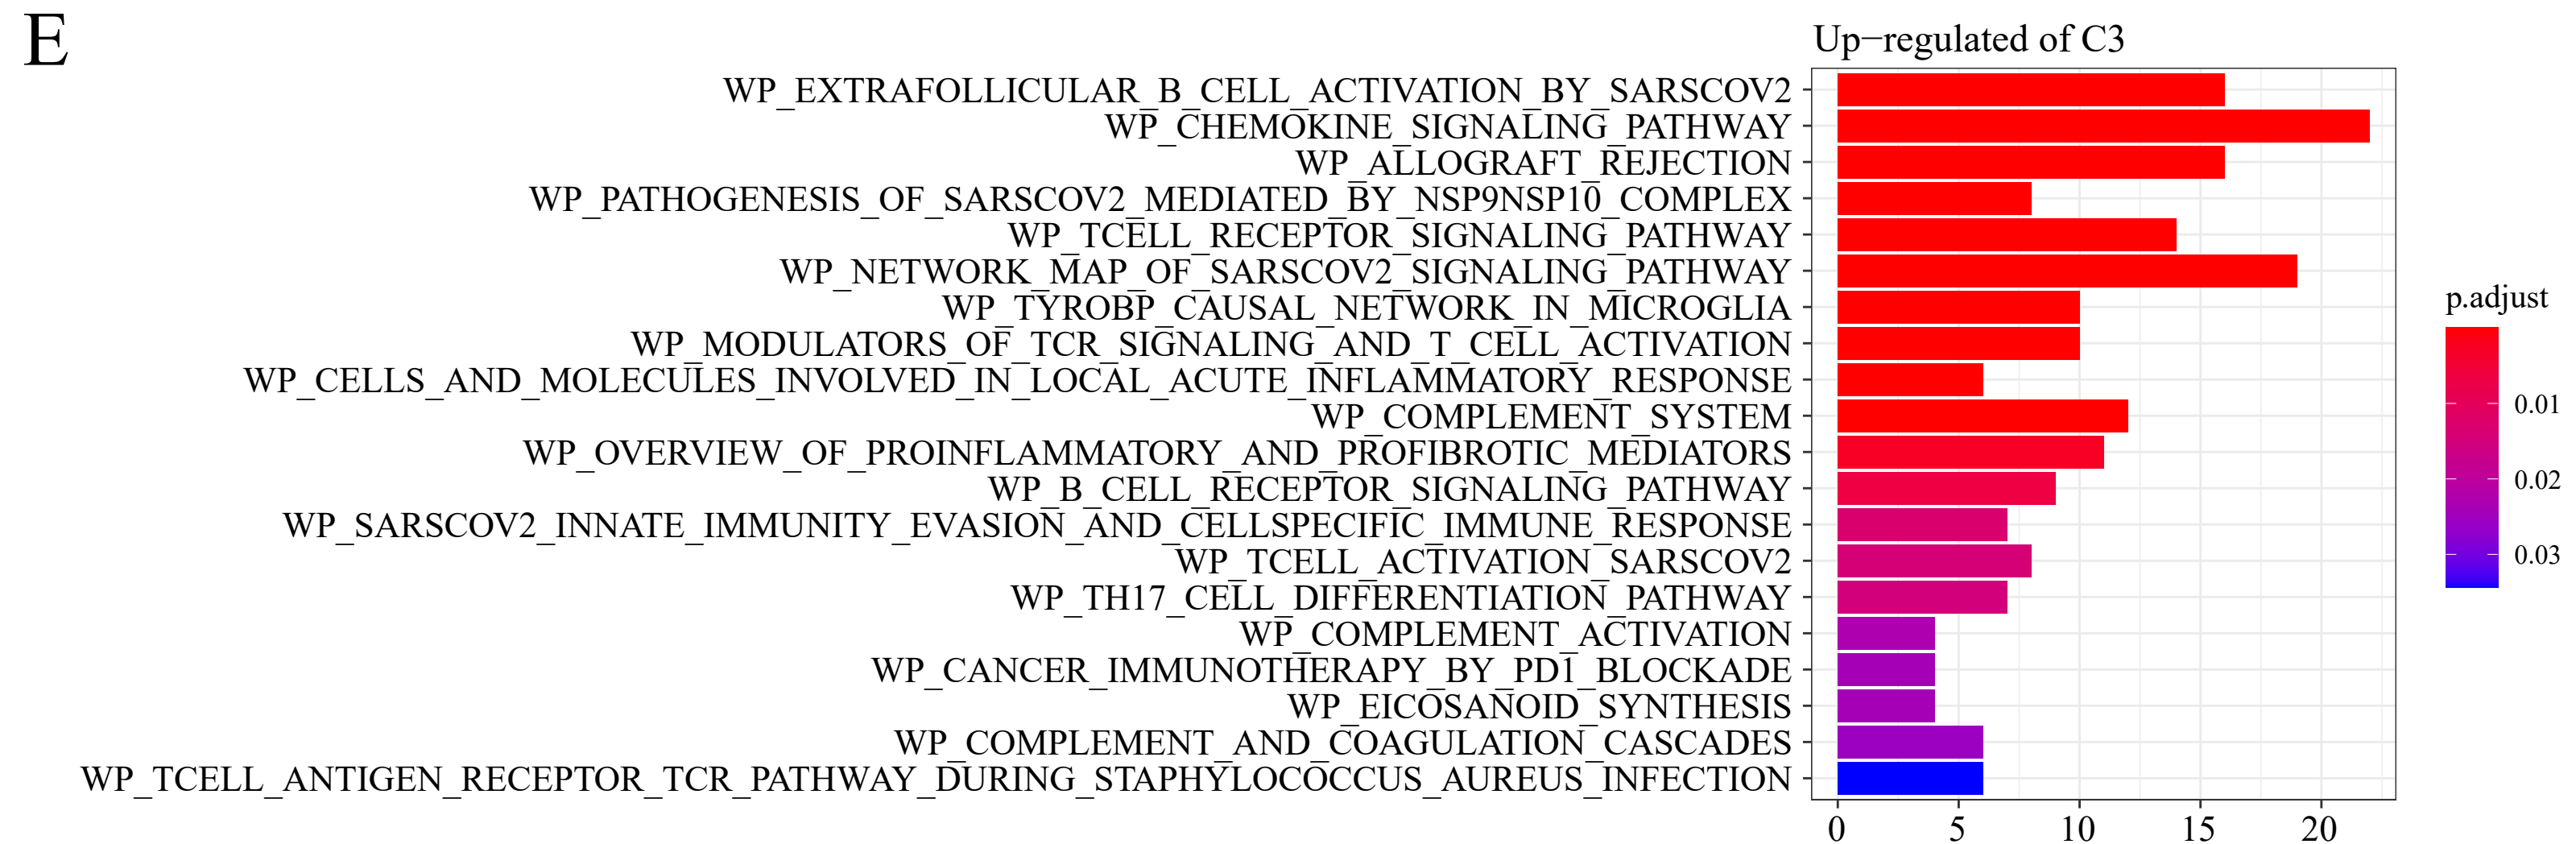

Supplement: Data_Sheet_4.PDF [file Data_Sheet_4.PDF]
